# Supplementary material
Source: PubMed Central journal article supplement (PMC5283934)
Supplement: Table1.pdf [file Table1.pdf]

Table 1. Percentage of total PRV labeled SNS neurons innervating IBAT, IWAT, and both fat depots. The percentage values were averaged across hamsters (n=7) and presented in tabular form as means  $\pm$  SE. Values that do not share a common superscript are significantly different at  $p < 0.05$ .

|                  | <b>% of IBAT SNS Neurons</b> | <b>% of IWAT SNS Neurons</b> | <b>% of IBAT + IWAT</b>     | <b>Total Mean of All PRV Labeled SNS Neurons</b> |
|------------------|------------------------------|------------------------------|-----------------------------|--------------------------------------------------|
| <b>Hindbrain</b> |                              |                              |                             |                                                  |
| 7N               | 37.8 $\pm$ 7.6               | 31.1 $\pm$ 7.3               | 31.1 $\pm$ 3.9              | 58.7 $\pm$ 11.4                                  |
| 10N              | 39.6 $\pm$ 10.1              | 37.9 $\pm$ 9.7               | 22.6 $\pm$ 2.6              | 95.7 $\pm$ 19.5                                  |
| 12N              | 37.6 $\pm$ 9.5 <sup>A</sup>  | 52.7 $\pm$ 12.0 <sup>A</sup> | 9.8 $\pm$ 3.8 <sup>B</sup>  | 42.3 $\pm$ 8.3                                   |
| A5               | 38.7 $\pm$ 8.5               | 29.4 $\pm$ 6.1               | 31.9 $\pm$ 3.4              | 61.4 $\pm$ 15.0                                  |
| AP               | 40.7 $\pm$ 11.6              | 38.0 $\pm$ 12.2              | 21.3 $\pm$ 2.1              | 58.4 $\pm$ 8.2                                   |
| Bar              | 33.1 $\pm$ 7.2               | 25.3 $\pm$ 6.2               | 41.6 $\pm$ 4.0              | 42.9 $\pm$ 9.1                                   |
| Gi               | 37.4 $\pm$ 3.7 <sup>A</sup>  | 42.5 $\pm$ 5.2 <sup>A</sup>  | 20.1 $\pm$ 2.6 <sup>B</sup> | 252.6 $\pm$ 45.9                                 |
| DPGi             | 38.2 $\pm$ 2.9 <sup>A</sup>  | 35.2 $\pm$ 3.0 <sup>A</sup>  | 26.6 $\pm$ 2.3 <sup>B</sup> | 63.6 $\pm$ 14.6                                  |
| GiA              | 29.1 $\pm$ 7.3               | 25.5 $\pm$ 4.9               | 45.4 $\pm$ 3.8              | 163.0 $\pm$ 39.8                                 |
| GiV              | 38.2 $\pm$ 6.9               | 27.3 $\pm$ 6.4               | 34.5 $\pm$ 1.7              | 114.1 $\pm$ 41.3                                 |
| LPGi             | 40.4 $\pm$ 8.4               | 28.8 $\pm$ 8.4               | 30.8 $\pm$ 1.0              | 291.6 $\pm$ 61.0                                 |
| IRt              | 43.4 $\pm$ 5.6 <sup>A</sup>  | 36.44 $\pm$ 5.6 <sup>A</sup> | 20.2 $\pm$ 2.1 <sup>B</sup> | 209.1 $\pm$ 13.9                                 |
| KF               | 47.7 $\pm$ 11.5              | 19.7 $\pm$ 4.9               | 32.6 $\pm$ 7.8              | 14.6 $\pm$ 6.5                                   |
| LC               | 26.5 $\pm$ 6.6               | 28.9 $\pm$ 8.3               | 44.6 $\pm$ 3.3              | 136.7 $\pm$ 23.1                                 |
| Li               | 42.8 $\pm$ 4.9 <sup>A</sup>  | 35.3 $\pm$ 5.9 <sup>A</sup>  | 22.0 $\pm$ 2.7 <sup>B</sup> | 36.0 $\pm$ 8.6                                   |
| LRt              | 40.3 $\pm$ 8.6               | 28.0 $\pm$ 8.4               | 31.8 $\pm$ 1.3              | 486.3 $\pm$ 54.7                                 |
| MdD              | 51.4 $\pm$ 10.3              | 27.4 $\pm$ 8.7               | 21.3 $\pm$ 2.3              | 220.1 $\pm$ 23.1                                 |
| MdV              | 41.0 $\pm$ 3.3 <sup>A</sup>  | 36.8 $\pm$ 3.9 <sup>A</sup>  | 22.3 $\pm$ 1.6 <sup>B</sup> | 176.1 $\pm$ 29.1                                 |
| Mo5              | 51.8 $\pm$ 13.5              | 20.0 $\pm$ 8.9               | 28.3 $\pm$ 7.6              | 36.6 $\pm$ 14.5                                  |
| <b>NTS</b>       |                              |                              |                             |                                                  |
| SolC             | 45.3 $\pm$ 10.3              | 32.8 $\pm$ 10.1              | 22.0 $\pm$ 1.0              | 113.1 $\pm$ 14.1                                 |
| SolCE            | 43.2 $\pm$ 12.6              | 35.6 $\pm$ 15.3              | 21.3 $\pm$ 6.0              | 13.0 $\pm$ 5.3                                   |
| SolDL            | 37.7 $\pm$ 9.4               | 30.2 $\pm$ 10.1              | 32.1 $\pm$ 4.6              | 101.0 $\pm$ 8.4                                  |
| SolG             | 38.5 $\pm$ 10.6              | 34.6 $\pm$ 11.9              | 26.9 $\pm$ 1.9              | 74.3 $\pm$ 9.0                                   |
| SolI             | 40.4 $\pm$ 10.0              | 30.5 $\pm$ 10.4              | 29.1 $\pm$ 4.5              | 22.0 $\pm$ 2.9                                   |
| SolIM            | 39.4 $\pm$ 8.4               | 31.0 $\pm$ 9.4               | 29.6 $\pm$ 1.4              | 57.7 $\pm$ 6.6                                   |
| SolM             | 42.4 $\pm$ 10.6              | 33.4 $\pm$ 11.1              | 24.2 $\pm$ 1.9              | 91.7 $\pm$ 14.8                                  |
| SolV             | 43.1 $\pm$ 9.7               | 31.9 $\pm$ 9.5               | 25.0 $\pm$ 2.8              | 54.1 $\pm$ 5.9                                   |
| SolVL            | 47.6 $\pm$ 11.6              | 28.9 $\pm$ 10.6              | 23.5 $\pm$ 2.5              | 107.3 $\pm$ 7.5                                  |
| PCRt/A           | 45.4 $\pm$ 3.1 <sup>A</sup>  | 36.3 $\pm$ 3.3 <sup>A</sup>  | 18.3 $\pm$ 2.0 <sup>B</sup> | 99.9 $\pm$ 18.9                                  |

|                              | <b>% of IBAT<br/>SNS Neurons</b> | <b>% of IWAT SNS<br/>Neurons</b> | <b>% of IBAT +<br/>IWAT</b> | <b>Total Mean of All<br/>PRV Labeled SNS<br/>Neurons</b> |
|------------------------------|----------------------------------|----------------------------------|-----------------------------|----------------------------------------------------------|
| PMn                          | 33.1 ± 6.3                       | 34.1 ± 3.8                       | 32.8 ± 3.9                  | 199.3 ± 29.6                                             |
| <b>Parabrachial Areas</b>    |                                  |                                  |                             |                                                          |
| LPB                          | 52.0 ± 18.3                      | 27.1 ± 9.5                       | 20.9 ± 8.9                  | 14.0 ± 7.7                                               |
| LPBC                         | 48.6 ± 14.6                      | 37.4 ± 18.2                      | 14.0 ± 5.6                  | 13.9 ± 8.2                                               |
| LPBV                         | 44.1 ± 12.8                      | 38.9 ± 9.3                       | 17.0 ± 6.3                  | 25.4 ± 8.9                                               |
| MPB                          | 37.0 ± 6.7                       | 29.8 ± 5.2                       | 33.2 ± 4.9                  | 54.6 ± 10.1                                              |
| <b>Doral Raphe<br/>Areas</b> |                                  |                                  |                             |                                                          |
| PMnR                         | 46.6 ± 10.7                      | 37.2 ± 8.9                       | 16.1 ± 5.2                  | 13.1 ± 4.4                                               |
| RC                           | 42.3 ± 8.4                       | 30.7 ± 8.7                       | 27.0 ± 5.0                  | 93.0 ± 13.3                                              |
| RLi                          | 42.4 ± 12.7                      | 43.4 ± 18.9                      | 20.4 ± 5.4                  | 7.0 ± 2.4                                                |
| RMg                          | 35.2 ± 9.9                       | 26.6 ± 6.7                       | 38.2 ± 3.6                  | 138.9 ± 29.9                                             |
| ROb                          | 35.9 ± 8.1                       | 28.7 ± 7.1                       | 35.5 ± 2.5                  | 178.4 ± 16.6                                             |
| RPa                          | 44.0 ± 7.4 <sup>A</sup>          | 17.9 ± 5.1 <sup>B</sup>          | 38.1 ± 3.1 <sup>A</sup>     | 132.1 ± 18.3                                             |
| rs                           | 40.0 ± 8.5                       | 30.4 ± 8.1                       | 29.5 ± 1.3                  | 310.9 ± 17.9                                             |
| RVL/C1                       | 34.8 ± 8.1                       | 36.0 ± 9.7                       | 29.2 ± 2.5                  | 119.1 ± 33.0                                             |
| SubCD                        | 39.0 ± 7.4                       | 28.7 ± 4.8                       | 32.3 ± 4.5                  | 67.7 ± 15.6                                              |
| SubCV                        | 39.9 ± 8.3                       | 23.3 ± 7.9                       | 36.8 ± 4.2                  | 81.0 ± 20.0                                              |
| vsc                          | 42.2 ± 8.5                       | 30.7 ± 7.7                       | 27.1 ± 2.1                  | 359.3 ± 38.1                                             |
| <b>Midbrain</b>              |                                  |                                  |                             |                                                          |
| Atg                          | 42.8 ± 19.7                      | 41.7 ± 15.0                      | 15.6 ± 8.6                  | 6.3 ± 1.8                                                |
| CnF                          | 42.6 ± 8.7                       | 35.0 ± 9.4                       | 22.4 ± 3.8                  | 41.4 ± 7.9                                               |
| Dk                           | 44.1 ± 8.6                       | 28.6 ± 7.8                       | 27.3 ± 2.8                  | 29.3 ± 7.8                                               |
| DMTg                         | 51.3 ± 7.0 <sup>A</sup>          | 30.4 ± 7.6 <sup>B</sup>          | 18.4 ± 4.5 <sup>B</sup>     | 26.3 ± 8.3                                               |
| DpMe                         | 41.7 ± 10.8                      | 40.9 ± 12.0                      | 17.4 ± 3.9                  | 55.0 ± 9.2                                               |
| DPO                          | 22.8 ± 6.1                       | 39.1 ± 7.0                       | 38.1 ± 2.9                  | 38.1 ± 17.2                                              |
| DpWh                         | 47.4 ± 14.7                      | 27.0 ± 14.8                      | 25.6 ± 9.7                  | 8.9 ± 2.7                                                |
| EW                           | 51.5 ± 13.3                      | 31.3 ± 11.0                      | 17.2 ± 4.6                  | 12.1 ± 3.1                                               |
| LDTg                         | 41.8 ± 8.6                       | 32.9 ± 11.0                      | 25.3 ± 5.7                  | 73.1 ± 25.8                                              |
| LDTg/-V                      | 51.1 ± 7.6                       | 24.0 ± 8.9                       | 24.9 ± 8.9                  | 16.9 ± 6.2                                               |
| MA3                          | 43.5 ± 9.8                       | 43.9 ± 13.2                      | 12.6 ± 5.7                  | 8.0 ± 2.3                                                |
| mlf                          | 46.9 ± 9.0                       | 30.7 ± 8.5                       | 22.4 ± 2.3                  | 139.4 ± 14.3                                             |

|                           | <b>% of IBAT<br/>SNS Neurons</b> | <b>% of IWAT<br/>SNS Neurons</b> | <b>% of IBAT +<br/>IWAT</b> | <b>Total Mean of All<br/>PRV Labeled SNS<br/>Neurons</b> |
|---------------------------|----------------------------------|----------------------------------|-----------------------------|----------------------------------------------------------|
| PAG                       | 39.7 ± 9.3                       | 31.5 ± 9.9                       | 28.9 ± 6.0                  | 645.9 ± 137.2                                            |
| PL                        | 35.9 ± 10.1                      | 23.9 ± 9.3                       | 40.3 ± 5.5                  | 36.9 ± 8.9                                               |
| PnC                       | 30.7 ± 4.4 <sup>A</sup>          | 49.4 ± 6.5 <sup>B</sup>          | 19.9 ± 2.5 <sup>A</sup>     | 66.6 ± 11.1                                              |
| PnO                       | 39.1 ± 6.6 <sup>A</sup>          | 42.0 ± 6.3 <sup>A</sup>          | 18.9 ± 2.9 <sup>B</sup>     | 71.0 ± 15.2                                              |
| PnR                       | 32.2 ± 6.9                       | 39.6 ± 8.6                       | 25.2 ± 6.0                  | 11.3 ± 3.0                                               |
| PnV                       | 42.0 ± 4.9 <sup>A</sup>          | 36.2 ± 6.6 <sup>AB</sup>         | 21.8 ± 2.6 <sup>B</sup>     | 16.1 ± 3.6                                               |
| PPTg                      | 41.2 ± 7.8                       | 33.5 ± 7.6                       | 25.3 ± 3.3                  | 141.6 ± 24.1                                             |
| pv                        | 40.4 ± 27.1                      | 39.2 ± 27.5                      | 20.5 ± 0.5                  | 8.3 ± 6.2                                                |
| RMC/scp                   | 37.8 ± 7.8 <sup>A</sup>          | 46.7 ± 6.7 <sup>A</sup>          | 15.6 ± 5.2 <sup>B</sup>     | 64.1 ± 16.9                                              |
| RPC/scp                   | 32.6 ± 6.0 <sup>A</sup>          | 57.2 ± 6.3 <sup>A</sup>          | 10.2 ± 4.8 <sup>B</sup>     | 7.9 ± 3.0                                                |
| RPF                       | 38.0 ± 10.0 <sup>A</sup>         | 51.1 ± 10.5 <sup>A</sup>         | 10.9 ± 5.2 <sup>B</sup>     | 16.3 ± 5.4                                               |
| RRF/A8                    | 39.5 ± 9.5                       | 39.2 ± 9.0                       | 21.4 ± 2.3                  | 35.0 ± 9.8                                               |
| RtTg                      | 22.3 ± 6.7 <sup>A</sup>          | 67.6 ± 8.7 <sup>B</sup>          | 10.1 ± 5.8 <sup>AC</sup>    | 20.3 ± 6.1                                               |
| SN                        | 43.5 ± 9.5                       | 33.8 ± 9.3                       | 22.7 ± 3.4                  | 57.1 ± 4.5                                               |
| Su3/C                     | 46.4 ± 8.2 <sup>A</sup>          | 32.5 ± 5.9 <sup>AB</sup>         | 21.0 ± 3.4 <sup>B</sup>     | 138.9 ± 26.4                                             |
| Su5                       | 58.7 ± 2.9 <sup>A</sup>          | 17.1 ± 4.6 <sup>B</sup>          | 24.3 ± 3.9 <sup>B</sup>     | 31.9 ± 8.9                                               |
| VLTg                      | 37.4 ± 6.3                       | 33.8 ± 7.4                       | 28.8 ± 4.8                  | 30.1 ± 10.2                                              |
| VTA                       | 45.6 ± 5.3                       | 28.8 ± 5.8                       | 25.6 ± 6.3                  | 126.3 ± 31.2                                             |
| <b>Forebrain</b>          |                                  |                                  |                             |                                                          |
| <i>Hypothalamic</i>       |                                  |                                  |                             |                                                          |
| AH                        | 42.7 ± 10.4                      | 39.7 ± 10.5                      | 17.7 ± 2.0                  | 101.1 ± 15.0                                             |
| Arc                       | 48.2 ± 9.4                       | 29.9 ± 9.2                       | 21.9 ± 3.5                  | 55.0 ± 6.9                                               |
| DM                        | 43.6 ± 8.8                       | 32.2 ± 4.8                       | 24.2 ± 5.7                  | 177.9 ± 21.9                                             |
| DMC                       | 55.1 ± 13.2                      | 27.0 ± 9.9                       | 18.0 ± 6.0                  | 29.3 ± 11.3                                              |
| DMD                       | 43.8 ± 11.6                      | 22.7 ± 6.9                       | 33.5 ± 12.4                 | 54.4 ± 24.2                                              |
| DMV                       | 58.4 ± 11.6                      | 24.9 ± 11.6                      | 16.7 ± 1.3                  | 27.9 ± 11.6                                              |
| DTM                       | 54.8 ± 16.8                      | 15.0 ± 10.5                      | 30.2 ± 12.5                 | 11.4 ± 3.8                                               |
| LA                        | 48.3 ± 17.8                      | 36.5 ± 14.7                      | 15.2 ± 7.8                  | 11.0 ± 3.9                                               |
| LH                        |                                  |                                  |                             |                                                          |
| proper/mfb                | 47.1 ± 8.2                       | 29.7 ± 6.3                       | 23.3 ± 3.9                  | 272.6 ± 18.1                                             |
| subZI                     | 42.4 ± 8.9                       | 33.5 ± 6.7                       | 24.2 ± 3.9                  | 84.4 ± 9.9                                               |
| Pe                        | 38.1 ± 10.6                      | 44.7 ± 11.0                      | 17.2 ± 2.4                  | 126.1 ± 6.7                                              |
| AVPe                      | 41.2 ± 8.9                       | 38.3 ± 7.4                       | 20.6 ± 4.0                  | 17.1 ± 5.3                                               |
| PH                        | 53.6 ± 8.5 <sup>A</sup>          | 24.9 ± 7.3 <sup>B</sup>          | 21.6 ± 6.1 <sup>B</sup>     | 51.6 ± 23.6                                              |
| <i>Preoptic<br/>Areas</i> |                                  |                                  |                             |                                                          |
| LPO                       | 42.9 ± 9.0                       | 34.5 ± 7.3                       | 22.6 ± 2.2                  | 62.7 ± 6.9                                               |
| MnPO                      | 56.6 ± 0.6                       | 26.3 ± 2.3                       | 17.1 ± 2.9                  | 5.6 ± 3.5                                                |
|                           | <b>% of IBAT<br/>SNS Neurons</b> | <b>% of IWAT<br/>SNS Neurons</b> | <b>% of IBAT +<br/>IWAT</b> | <b>Total Mean of All<br/>PRV Labeled SNS</b>             |

|                              | Neurons                  |                          |                          |              |
|------------------------------|--------------------------|--------------------------|--------------------------|--------------|
| MPA                          | 42.9 ± 8.4               | 33.2 ± 7.6               | 23.9 ± 2.7               | 137.4 ± 35.3 |
| MPOC                         | 42.3 ± 11.3              | 46.4 ± 12.7              | 11.3 ± 4.2               | 4.9 ± 0.6    |
| MPOL                         | 45.2 ± 12.5              | 35.8 ± 10.2              | 19.0 ± 2.5               | 25.3 ± 6.2   |
| MPOM                         | 45.1 ± 8.8               | 34.1 ± 7.8               | 20.0 ± 2.5               | 124.7 ± 15.9 |
| <b>PVH</b>                   |                          |                          |                          |              |
| PaAP                         | 51.2 ± 14.7              | 24.5 ± 11.1              | 24.3 ± 6.3               | 26.1 ± 11.0  |
| PaDC                         | 39.2 ± 8.9               | 37.5 ± 6.6               | 23.3 ± 3.9               | 33.1 ± 5.0   |
| PaLM                         | 41.0 ± 6.6               | 31.3 ± 6.8               | 27.7 ± 2.3               | 69.4 ± 6.3   |
| PaMM                         | 37.7 ± 6.5 <sup>A</sup>  | 43.5 ± 6.4 <sup>A</sup>  | 18.8 ± 2.6 <sup>B</sup>  | 88.1 ± 5.1   |
| PaMP                         | 36.5 ± 6.5               | 41.9 ± 7.8               | 21.6 ± 3.6               | 90.9 ± 3.3   |
| PaPo                         | 48.4 ± 8.2 <sup>A</sup>  | 32.7 ± 6.6 <sup>AB</sup> | 18.9 ± 3.4 <sup>B</sup>  | 71.9 ± 22.3  |
| PaV                          | 40.2 ± 5.5 <sup>A</sup>  | 42.1 ± 7.9 <sup>A</sup>  | 17.7 ± 4.1 <sup>B</sup>  | 17.1 ± 5.8   |
| RCh                          | 57.3 ± 17.9              | 27.8 ± 14.5              | 14.9 ± 5.5               | 8.1 ± 2.6    |
| SPa                          | 37.0 ± 8.6 <sup>A</sup>  | 48.1 ± 7.4 <sup>A</sup>  | 15.0 ± 3.4 <sup>B</sup>  | 16.6 ± 3.4   |
| SCh                          | 37.0 ± 12.6              | 43.4 ± 13.1              | 19.6 ± 8.0               | 39.1 ± 7.4   |
| VMH                          | 54.7 ± 8.8 <sup>A</sup>  | 17.5 ± 9.6 <sup>B</sup>  | 27.8 ± 6.5 <sup>AB</sup> | 13.7 ± 5.0   |
| VMHC                         | 47.2 ± 14.7              | 32.6 ± 11.7              | 20.2 ± 7.0               | 11.4 ± 3.4   |
| VMHDM                        | 43.1 ± 10.9              | 34.8 ± 11.6              | 22.1 ± 7.9               | 26.6 ± 7.5   |
| VMHVL                        | 38.6 ± 9.8               | 31.8 ± 9.3               | 29.6 ± 4.3               | 15.6 ± 2.9   |
| <i>Thalamic</i>              |                          |                          |                          |              |
| PF                           | 53.1 ± 4.8               | 21.4 ± 10.7              | 25.5 ± 7.3               | 17.7 ± 9.2   |
| Re                           | 43.9 ± 8.7               | 35.4 ± 5.0               | 20.7 ± 4.7               | 101.4 ± 25.9 |
| VRe                          | 37.1 ± 7.1               | 35.6 ± 8.0               | 27.3 ± 7.4               | 21.3 ± 5.1   |
| Xi                           | 53.5 ± 12.0 <sup>A</sup> | 35.3 ± 9.2 <sup>AB</sup> | 11.3 ± 2.9 <sup>B</sup>  | 25.1 ± 7.4   |
| <i>Other forebrain areas</i> |                          |                          |                          |              |
| BST                          | 40.0 ± 11.9              | 32.2 ± 9.1               | 27.8 ± 7.4               | 123.6 ± 38.7 |
| PeF                          | 38.1 ± 8.7               | 42.2 ± 7.9               | 19.7 ± 3.3               | 30.3 ± 9.2   |
| PMD                          | 50.27 ± 16.9             | 29.9 ± 14.5              | 19.9 ± 5.9               | 13.0 ± 5.0   |
| PMV                          | 53.2 ± 17.4              | 25.5 ± 21.1              | 21.2 ± 4.3               | 8.1 ± 4.3    |
| PR/scp                       | 42.8 ± 9.3               | 33.7 ± 11.3              | 23.5 ± 4.4               | 12.7 ± 3.3   |
| PSTh                         | 62.2 ± 3.6 <sup>A</sup>  | 18.5 ± 5.0 <sup>B</sup>  | 17.2 ± 2.6 <sup>B</sup>  | 45.7 ± 18.2  |
| scp                          | 38.2 ± 9.7               | 42.6 ± 15.0              | 19.3 ± 3.5               | 34.9 ± 7.1   |
| TC                           | 31.7 ± 9.1               | 38.8 ± 19.4              | 29.5 ± 14.7              | 7.3 ± 2.7    |
| VP                           | 39.7 ± 13.7              | 44.3 ± 14.8              | 16.0 ± 6.0               | 13.3 ± 4.5   |
| ZI                           | 50.6 ± 7.8 <sup>A</sup>  | 32.8 ± 7.1 <sup>B</sup>  | 16.6 ± 1.7 <sup>C</sup>  | 101.3 ± 15.6 |
